# Supplementary material for: Land Consumption of Current Diets Compared to the Planetary Health Diet: How many People can our Land Feed?
Source: Preprints.org preprint supplement (doi:10.20944/preprints202304.0031.v1), 2023-04-04
Supplement: Supplementary file 1 [file supplementary]

## Sheet: Overview Tables (Sources)
Table number	Name	Sources
S1	Calculation share of cattle	Bundesministerium für Ernährung und Landwirtschaft. Rinderhaltung in Deutschland, 2023. Available online: https://www.bmel-statistik.de/landwirtschaft/tierhaltung/rinderhaltung (accessed on 28 March 2023).
S1	Calculation share of cattle	Brüggemann, C. Lebendvieh-Export. Weniger Rinder aus Deutschland exportiert, 2021. Available online: https://www.topagrar.com/rind/news/weniger-rinder-aus-deutschland-exportiert-12468630.html (accessed on 28 March 2023).
S1	Calculation share of other poultry	DLG-Ausschuss für Geflügel. Haltung von Masthühnern. Haltungsansprüche - Fütterung - Tiergesundheit, 2021. Available online: https://www.dlg.org/de/landwirtschaft/themen/tierhaltung/gefluegel/dlg-merkblatt-406/ (accessed on 13 March 2023).
S1	Calculation share of other poultry	Hiller, P. Auf die Mischung kommt es an: Eigenmischungen für Geflügel glasklar formuliert, 2023. Available online: https://www.lwk-niedersachsen.de/lwk/news/25369_Auf_die_Mischung_kommt_es_an_Eigenmischungen_fuer_Gefluegel_glasklar_formuliert (accessed on 13 March 2023).
S3	Crops land and crops in ha	Hessisches Statistisches Landesamt. Landwirtschaftszählung 2020: Landwirtschaftliche Betriebe und Bodennutzung. Kennziffer: C IV 10 - 2/2020, 2022. Available online: https://www.statistischebibliothek.de/mir/servlets/MCRFileNodeServlet/HEHeft_derivate_00011231/CIV10_2_20_2kA_a.pdf (accessed on 28 March 2023).	Table 1-6
S4	Calc. base energy plants	Greenpeace. Greenpeace Nachrichten 01/2023, 2023.
S4	Calc. base energy plants	Statistisches Bundesamt. Feldfrüchte und Grünland: Ackerland nach Hauptfruchtgruppen und Fruchtarten, 2022. Available online: https://www.destatis.de/DE/Themen/Branchen-Unternehmen/Landwirtschaft-Forstwirtschaft-Fischerei/Feldfruechte-Gruenland/Tabellen/ackerland-hauptnutzungsarten-kulturarten.html (accessed on 28 March 2023).
S4	Calc. base energy plants	Weltagrarbericht. Ein Fünftel des deutschen Ackerlandes dient Produktion von Biogas und Biosprit, 2018 Available online: https://www.weltagrarbericht.de/aktuelles/nachrichten/news/de/33208.html (accessed on 27 January 2023).
S5	Livestock	Hessisches Statistisches Landesamt. Landwirtschaftszählung 2020 Landwirtschaftliche Betriebe und Viehbestände: Kennziffer: C IV 10 - 3/20, 2021. Available online: https://statistik.hessen.de/sites/statistik.hessen.de/files/2022-06/CIV10_3_20.pdf (accessed on 12 December 2022).	Table 2.0201.1
S7	Crops and grassland	Statistisches Bundesamt. Wachstum und Ernte - Feldfrüchte - Fachserie 3: Reihe 3.2.1 - 16/2021, 2022. Available online: https://www.destatis.de/DE/Themen/Branchen-Unternehmen/Landwirtschaft-Forstwirtschaft-Fischerei/Feldfruechte-Gruenland/Publikationen/Downloads-Feldfruechte/feldfruechte-jahr-2030321217164.html (accessed on 28 March 2023).
S12	Crop land total	Bundesministerium für Ernährung und Landwirtschaft. Ackerbau , 2020. Available online: https://www.bmel.de/DE/themen/landwirtschaft/pflanzenbau/ackerbau/ackerbau_node.html (accessed on 28 March 2023).
A2	Yields of selected field crops in Hesse 2014 to 2021 (in dt/ha) - 1dt - 100kg	Statistisches Bundesamt. Wachstum und Ernte - Feldfrüchte - Fachserie 3: Reihe 3.2.1 - 16/2021 , 2022. Available online: https://www.destatis.de/DE/Themen/Branchen-Unternehmen/Landwirtschaft-Forstwirtschaft-Fischerei/Feldfruechte-Gruenland/Publikationen/Downloads-Feldfruechte/feldfruechte-jahr-2030321217164.html (accessed on 28 March 2023).
A3	Food in general	DBV. Pro-Kopf-Konsum von Lebensmitteln in Deutschland in den Jahren 1900 und 2021: (in kg), 2022. Available online: https://de.statista.com/statistik/daten/studie/163514/umfrage/pro-kopf-verbrauch-von-lebensmitteln-in-deutschland/ (accessed on 28 March 2023).
A3	Cereals	Bundesministerium für Ernährung und Landwirtschaft. Pro-Kopf-Konsum von Getreide in Deutschland in den Jahren 1950/51 bis 2020/21 (in Kilogramm Mehlwert), 2022. Available online: https://de.statista.com/statistik/daten/studie/175412/umfrage/pro-kopf-verbrauch-von-getreideerzeugnissen-mehlwert-in-deutschland-seit-1935/ (accessed on 28 March 2023).
A3	Meat in types	Bundesanstalt für Landwirtschaft und Ernährung. Pro-Kopf-Konsum von Fleisch in Deutschland nach Art in den Jahren 2019 bis 2021 (in Kilogramm), 2022. Available online: https://de.statista.com/statistik/daten/studie/311479/umfrage/pro-kopf-konsum-von-fleisch-in-deutschland-nach-arten/ (accessed on 28 March 2023).										10.22
A3	Pulses	Bundesministerium für Ernährung und Landwirtschaft. Pro-Kopf-Konsum von Hülsenfrüchten in Deutschland in den Jahren 2008/09 bis 2016/2017² (in Kilogramm), 2020. Available online: https://de.statista.com/statistik/daten/studie/175416/umfrage/pro-kopf-verbrauch-von-huelsenfruechten-in-deutschland-seit-1935/ (accessed on 28 March 2023).
A3	Sugar	Bundesanstalt für Landwirtschaft und Ernährung. Pro-Kopf-Konsum von Zucker in Deutschland in den Jahren 1950/51 bis 2020/21 (in Kilogramm Weißzuckerwert), 2022. Available online: https://de.statista.com/statistik/daten/studie/175483/umfrage/pro-kopf-verbrauch-von-zucker-in-deutschland/ (accessed on 28 March 2023).

## Sheet: S1_Feeding examples
Calculation share of cattle
	Germany	Offspring dairy cows per year	Retired dairy cows	non-dairy cows	thereof slaughtered minus dairy cows	Share of slaughtered animals
Slaughtered in Germany	2936029				2.22361e+06	0.370659
Cattle total	10986000			5.99908e+06
thereof - Dairy cows	4274500	712417	712417
thereof exported	851000
Slaughtered in Hesse		Share slaughtered dairy cows
Cattle total	406304
thereof - Dairy cows	124705	0.166667
thereof exported
thereof offspring dairy cows	20784.2	0.166667	born annually	0.333333	dairy cow offspring (two years)
thereof cattle non dairy	260815
slaughtered non dairy	96673.3
slaughtered dairy (retired)	20784.2
average slaughter weight non-dairy
average slaughter weight dairy	250	kg
Calculation share of other poultry
Poultry	Days per life	Weeks per life	Feeding in kg/life	Feeding in g/day over lifetime average		Shares	Laying hens	Broiler chicken	Poultry for slaughtering
Laying hens	364	52	35.6	97.8022		Grass land			0.02
Broiler chicken	37	5.28571	3.145	85		Clover grass, lucerne			0.03
Ducks	84	12	12.2	145.238		Cereals	0.33	0.38	0.32
Geese	90	12.8571	17	188.889		Maize silage	0.4	0.4	0.4
Turkeys	126	18	41.1	326.19		Legumes	0.15	0.2	0.2
						Vegetables/Carottes
						Sunflower/Rape seed	0.12	0.03	0.03
	Laying hens	Broiler chicken	Ducks	Geese	Turkeys
Grass land			0.00290476	0.00377778	0.00652381			Ducks	Geese	Turkeys
Clover grass, lucerne			0.00435714	0.00566667	0.00978571		Region 1	0.0388177	0.106379	0.854804
Cereals	0.0322747	0.0323	0.0464762	0.0604444	0.104381		Region 2	0.230057	0.562217	0.207726
Maize silage	0.0391209	0.034	0.0580952	0.0755556	0.130476		Region 3	0.0187401	0.0903765	0.890883
Legumes	0.0146703	0.017	0.0290476	0.0377778	0.0652381		Region 4	0.0163646	0.044964	0.938671
Vegetables/Carottes	0	0	0	0	0		Region 5	0.386518	0.433413	0.148928
Sunflower/Rape seed	0.0117363	0.00255	0.00435714	0.00566667	0.00978571		Region 6	0.322581	0.53871	0.13871
Sum	0.0978022	0.08585	0.145238	0.188889	0.32619

## Sheet: S2_Livestock feed
					Dairy cow + offspring				Cattle				Sheep				Goat				Fattening pig				Breeding sow				Equine				Laying hens + pullets				Broiler chicken				Other Poultry (Geese, Turkey, Ducks)
Number of animals:								166273				240031				129507				10564				543934				32645				34453				1642382				1011090				135093
	Fodder	Available agricultural area	Necessary feed (sum)	Left/missing (e.g. for human consumption)	in kg/day	in kg/year	share ha (in %) and yield	feed requirements in ha	in kg/day	in kg/year	share ha (in %) and yield	feed requirements in ha	in kg/day	in kg/year	share ha (in %) and yield	feed requirements in ha	in kg/day	in kg/year	share ha (in %) and yield	feed requirements in ha	in kg/day	in kg/ year	share ha (in %) and yield	feed requirements in ha	in kg/day	in kg/year	share ha (in %) and yield	feed requirements in ha	in kg/day	in kg/year	share ha (in %) and yield	feed requirements in ha	in kg/day	in kg/year	share ha (in %) and yield	feed requirements in ha	in kg/day	in kg/year	share ha (in %) and yield	feed requirements in ha	in kg/day	in kg/year	share ha (in %) and yield	feed requirements in ha
Region 1 - Hesse	Grass land	294288	208985	85303.4	6.9423	2533.94	0.422323	70221.1	7.0655	2578.91	0.429818	103169	1.8	657	0.1095	14181	0.7	255.5	0.0425833	449.85		0	0	0		0	0	0	10	3650	0.608333	20958.9	0	0	0	0	0	0	0	0	0.000520207	0.189876	3.16459e-05	4.27515
	Clover grass, lucerne	5300	33822.7	-28522.7	3.35313	1223.89	0.202967	33748	0	0	0	0		0	0	0		0	0	0		0	0	0		0	0	0	0	0	0	0	0	0	0	0	0	0	0	0	0.00913681	3.33494	0.000553057	74.7142
	Cereals	286368	98802.9	187565	0.538062	196.393	0.0294442	4895.78	0.626101	228.527	0.0342619	8223.9	2.1	766.5	0.114918	14882.6	0.3	109.5	0.0164168	173.427	1.82	664.3	0.0995952	54173.2	4.6	1679	0.251724	8217.53	1.5	547.5	0.082084	2828.04	0.0322747	11.7803	0.00176616	2900.71	0.0323	11.7895	0.00176754	1787.14	0.0974593	35.5727	0.00533323	720.482
	Maize silage	39941.9	21510.1	18431.8	9.32992	3405.42	0.062154	10334.6	5.47838	1999.61	0.0364959	8760.13		0	0	0		0	0	0	0.455	166.075	0.00303112	1648.73		0	0	0		0	0	0	0.0391209	14.2791	0.000260615	428.03	0.034	12.41	0.000226501	229.013	0.121824	44.4658	0.000811568	109.637
	Legumes	13277.1	58312.4	-45035.3	1.4349	523.737	0.148789	24739.6	0	0	0	0		0	0	0		0	0	0	0.455	166.075	0.0471804	25663	0.82	299.3	0.0850284	2775.75		0	0	0	0.0146703	5.35467	0.00152121	2498.41	0.017	6.205	0.00176278	1782.33	0.0609121	22.2329	0.00631617	853.27
	Vegetables/Carottes	7494	43.8654	7450.13	0	0	0	0	0	0	0	0		0	0	0		0	0	0		0	0	0		0	0	0	0.1	36.5	0.00127319	43.8654	0	0	0	0	0	0	0	0	0	0	0	0
	Sunflower/Rape seed	40075.9	29848.3	18034.2	0.237921	86.8413	0.0332725	5532.33	0.469576	171.395	0.0656686	15762.5		0	0	0		0	0	0	0.07	25.55	0.00978927	5324.72		0	0	0		0	0	0	0.0117363	4.28374	0.00164128	2695.61	0.00255	0.93075	0.000356609	360.564	0.00913681	3.33494	0.00127775	172.616
					Dairy cow + offspring				Cattle				Sheep				Goat				Fattening pig				Breeding sow				Equine				Laying hens + pullets				Broiler chicken				Other Poultry (Geese, Turkey, Ducks)
Number of animals:								33952				62757				35519				3377				81347				4934				18169				738156				42141				13927
	Fodder	Available agricultural area	Necessary feed (sum)	Left/missing (e.g. for human consumption)	in kg/day	in kg/year	share ha (in %) and yield	feed requirements in ha	in kg/day	in kg/year	share ha (in %) and yield	feed requirements in ha	in kg/day	in kg/year	share ha (in %) and yield	feed requirements in ha	in kg/day	in kg/year	share ha (in %) and yield	feed requirements in ha	in kg/day	in kg/ year	share ha (in %) and yield	feed requirements in ha	in kg/day	in kg/year	share ha (in %) and yield	feed requirements in ha	in kg/day	in kg/year	share ha (in %) and yield	feed requirements in ha	in kg/day	in kg/year	share ha (in %) and yield	feed requirements in ha	in kg/day	in kg/year	share ha (in %) and yield	feed requirements in ha	in kg/day	in kg/year	share ha (in %) and yield	feed requirements in ha
Region 2 - GD Da	Grass land	83574	56402.2	27171.8	6.9423	2533.94	0.422323	14338.7	7.0655	2578.91	0.429818	26974.1	1.8	657	0.1095	3889.33	0.7	255.5	0.0425833	143.804	0	0	0	0	0	0	0	0	10	3650	0.608333	11052.8	0	0	0	0	0	0	0	0	0.00414736	1.51379	0.000252298	3.51375
	Clover grass, lucerne	1662.84	6896.38	-5233.54	3.35313	1223.89	0.202967	6891.13	0	0	0	0	0	0	0	0	0	0	0	0	0	0	0	0	0	0	0	0	0	0	0	0	0	0	0	0	0	0	0	0	0.00622104	2.27068	0.000376563	5.2444
	Cereals	87506.2	19551	67955.2	0.538062	196.393	0.0294442	999.688	0.626101	228.527	0.0342619	2150.17	2.1	766.5	0.114918	4081.76	0.3	109.5	0.0164168	55.4395	1.82	664.3	0.0995952	8101.77	4.6	1679	0.251724	1242.01	1.5	547.5	0.082084	1491.38	0.0322747	11.7803	0.00176616	1303.7	0.0323	11.7895	0.00176754	74.486	0.0663577	24.2206	0.00363127	50.5727
	Maize silage	10635.8	4856.81	5779.01	9.32992	3405.42	0.062154	2110.25	5.47838	1999.61	0.0364959	2290.37	0	0	0	0	0	0	0	0	0.455	166.075	0.00303112	246.572	0	0	0	0	0	0	0	0	0.0391209	14.2791	0.000260615	192.375	0.034	12.41	0.000226501	9.54499	0.0829471	30.2757	0.000552577	7.69574
	Legumes	3270.27	10566.3	-7295.99	1.4349	523.737	0.148789	5051.68	0	0	0	0	0	0	0	0	0	0	0	0	0.455	166.075	0.0471804	3837.98	0.82	299.3	0.0850284	419.53	0	0	0	0	0.0146703	5.35467	0.00152121	1122.89	0.017	6.205	0.00176278	74.2855	0.0414736	15.1379	0.00430053	59.8934
	Vegetables/Carottes	6582	23.1327	6558.87	0	0	0	0	0	0	0	0	0	0	0	0	0	0	0	0	0	0	0	0	0	0	0	0	0.1	36.5	0.00127319	23.1327	0	0	0	0	0	0	0	0	0	0	0	0
	Sunflower/Rape seed	10580.2	7285.83	3294.35	0.237921	86.8413	0.0332725	1129.67	0.469576	171.395	0.0656686	4121.16	0	0	0	0	0	0	0	0	0.07	25.55	0.00978927	796.328	0	0	0	0	0	0	0	0	0.0117363	4.28374	0.00164128	1211.52	0.00255	0.93075	0.000356609	15.0279	0.00622104	2.27068	0.000869992	12.1164
					Dairy cow + offspring				Cattle				Sheep				Goat				Fattening pig				Breeding sow				Equine				Laying hens + pullets				Broiler chicken				Other Poultry (Geese, Turkey, Ducks)
Number of animals:								43870.7				68548.3				45998				2924				103216				7459				7216				247613				114784				24066
	Fodder	Available agricultural area	Necessary feed (sum)	Left/missing (e.g. for human consumption)	in kg/day	in kg/year	share ha (in %) and yield	feed requirements in ha	in kg/day	in kg/year	share ha (in %) and yield	feed requirements in ha	in kg/day	in kg/year	share ha (in %) and yield	feed requirements in ha	in kg/day	in kg/year	share ha (in %) and yield	feed requirements in ha	in kg/day	in kg/ year	share ha (in %) and yield	feed requirements in ha	in kg/day	in kg/year	share ha (in %) and yield	feed requirements in ha	in kg/day	in kg/year	share ha (in %) and yield	feed requirements in ha	in kg/day	in kg/year	share ha (in %) and yield	feed requirements in ha	in kg/day	in kg/year	share ha (in %) and yield	feed requirements in ha	in kg/day	in kg/year	share ha (in %) and yield	feed requirements in ha
Region 3 - GD Gi	Grass land	92089	57551	34538	6.9423	2533.94	0.422323	18527.6	7.0655	2578.91	0.429818	29463.3	1.8	657	0.1095	5036.78	0.7	255.5	0.0425833	124.514	0	0	0	0	0	0	0	0	10	3650	0.608333	4389.73	0	0	0	0	0	0	0	0	0.00620781	2.26585	0.000377642	9.08833
	Clover grass, lucerne	1291.98	8917.86	-7625.88	3.35313	1223.89	0.202967	8904.29	0	0	0	0	0	0	0	0	0	0	0	0	0	0	0	0	0	0	0	0	0	0	0	0	0	0	0	0	0	0	0	0	0.00931172	3.39878	0.000563645	13.5647
	Cereals	71947.2	22495.1	49452.1	0.538062	196.393	0.0294442	1291.73	0.626101	228.527	0.0342619	2348.6	2.1	766.5	0.114918	5285.98	0.3	109.5	0.0164168	48.0027	1.82	664.3	0.0995952	10279.8	4.6	1679	0.251724	1877.61	1.5	547.5	0.082084	592.318	0.0322747	11.7803	0.00176616	437.324	0.0323	11.7895	0.00176754	202.885	0.099325	36.2536	0.00543533	130.807
	Maize silage	9279.17	5651.77	3627.4	9.32992	3405.42	0.062154	2726.74	5.47838	1999.61	0.0364959	2501.73	0	0	0	0	0	0	0	0	0.455	166.075	0.00303112	312.86	0	0	0	0	0	0	0	0	0.0391209	14.2791	0.000260615	64.5318	0.034	12.41	0.000226501	25.9987	0.124156	45.317	0.000827104	19.9051
	Legumes	3699.97	12765.4	-9065.42	1.4349	523.737	0.148789	6527.47	0	0	0	0	0	0	0	0	0	0	0	0	0.455	166.075	0.0471804	4869.77	0.82	299.3	0.0850284	634.227	0	0	0	0	0.0146703	5.35467	0.00152121	376.672	0.017	6.205	0.00176278	202.339	0.0620781	22.6585	0.00643708	154.915
	Vegetables/Carottes	150	9.18737	140.813	0	0	0	0	0	0	0	0	0	0	0	0	0	0	0	0	0	0	0	0	0	0	0	0	0.1	36.5	0.00127319	9.18737	0	0	0	0	0	0	0	0	0	0	0	0
	Sunflower/Rape seed	10634.9	7450.25	3184.66	0.237921	86.8413	0.0332725	1459.69	0.469576	171.395	0.0656686	4501.47	0	0	0	0	0	0	0	0	0.07	25.55	0.00978927	1010.41	0	0	0	0	0	0	0	0	0.0117363	4.28374	0.00164128	406.402	0.00255	0.93075	0.000356609	40.933	0.00931172	3.39878	0.00130221	31.3391
					Dairy cow + offspring				Cattle				Sheep				Goat				Fattening pig				Breeding sow				Equine				Laying hens + pullets				Broiler chicken				Other Poultry (Geese, Turkey, Ducks)
Number of animals:								88073.3				109103				47990				4263				359371				20190				9068				656613				854165				97100
	Fodder	Available agricultural area	Necessary feed (sum)	Left/missing (e.g. for human consumption)	in kg/day	in kg/year	share ha (in %) and yield	feed requirements in ha	in kg/day	in kg/year	share ha (in %) and yield	feed requirements in ha	in kg/day	in kg/year	share ha (in %) and yield	feed requirements in ha	in kg/day	in kg/year	share ha (in %) and yield	feed requirements in ha	in kg/day	in kg/ year	share ha (in %) and yield	feed requirements in ha	in kg/day	in kg/year	share ha (in %) and yield	feed requirements in ha	in kg/day	in kg/year	share ha (in %) and yield	feed requirements in ha	in kg/day	in kg/year	share ha (in %) and yield	feed requirements in ha	in kg/day	in kg/year	share ha (in %) and yield	feed requirements in ha	in kg/day	in kg/year	share ha (in %) and yield	feed requirements in ha
Region 4 - GD Ka	Grass land	118627	95079.9	23547.1	6.9423	2533.94	0.422323	37195.4	7.0655	2578.91	0.429818	46894.3	1.8	657	0.1095	5254.9	0.7	255.5	0.0425833	181.533	0	0	0	0	0	0	0	0	10	3650	0.608333	5516.37	0	0	0	0	0	0	0	0	0.00634111	2.31451	0.000385751	37.4564
	Clover grass, lucerne	2330.71	17931.9	-15601.2	3.35313	1223.89	0.202967	17876	0	0	0	0	0	0	0	0	0	0	0	0	0	0	0	0	0	0	0	0	0	0	0	0	0	0	0	0	0	0	0	0	0.00951167	3.47176	0.000575748	55.9051
	Cereals	126916	56743	70172.9	0.538062	196.393	0.0294442	2593.25	0.626101	228.527	0.0342619	3738.06	2.1	766.5	0.114918	5514.89	0.3	109.5	0.0164168	69.9848	1.82	664.3	0.0995952	35791.6	4.6	1679	0.251724	5082.31	1.5	547.5	0.082084	744.337	0.0322747	11.7803	0.00176616	1159.68	0.0323	11.7895	0.00176754	1509.77	0.101458	37.0321	0.00555204	539.103
	Maize silage	20026.9	10991.8	9035.07	9.32992	3405.42	0.062154	5474.11	5.47838	1999.61	0.0364959	3981.8	0	0	0	0	0	0	0	0	0.455	166.075	0.00303112	1089.3	0	0	0	0	0	0	0	0	0.0391209	14.2791	0.000260615	171.123	0.034	12.41	0.000226501	193.469	0.126822	46.2901	0.000844864	82.0363
	Legumes	6307.87	34919.3	-28611.5	1.4349	523.737	0.148789	13104.3	0	0	0	0	0	0	0	0	0	0	0	0	0.455	166.075	0.0471804	16955.3	0.82	299.3	0.0850284	1716.72	0	0	0	0	0.0146703	5.35467	0.00152121	998.848	0.017	6.205	0.00176278	1505.71	0.0634111	23.1451	0.0065753	638.462
	Vegetables/Carottes	763	11.5453	751.455	0	0	0	0	0	0	0	0	0	0	0	0	0	0	0	0	0	0	0	0	0	0	0	0	0.1	36.5	0.00127319	11.5453	0	0	0	0	0	0	0	0	0	0	0	0
	Sunflower/Rape seed	18860.8	15124.5	3736.36	0.237921	86.8413	0.0332725	2930.42	0.469576	171.395	0.0656686	7164.62	0	0	0	0	0	0	0	0	0.07	25.55	0.00978927	3517.98	0	0	0	0	0	0	0	0	0.0117363	4.28374	0.00164128	1077.68	0.00255	0.93075	0.000356609	304.603	0.00951167	3.47176	0.00133018	129.16
					Dairy cow + offspring				Cattle				Sheep				Goat				Fattening pig				Breeding sow				Equine				Laying hens + pullets				Broiler chicken				Other Poultry (Geese, Turkey, Ducks)
Number of animals:								21340				40557				22594				1870				62429				3886				12117				347727				2799				5459
	Fodder	Available agricultural area	Necessary feed (sum)	Left/missing (e.g. for human consumption)	in kg/day	in kg/year	share ha (in %) and yield	feed requirements in ha	in kg/day	in kg/year	share ha (in %) and yield	feed requirements in ha	in kg/day	in kg/year	share ha (in %) and yield	feed requirements in ha	in kg/day	in kg/year	share ha (in %) and yield	feed requirements in ha	in kg/day	in kg/ year	share ha (in %) and yield	feed requirements in ha	in kg/day	in kg/year	share ha (in %) and yield	feed requirements in ha	in kg/day	in kg/year	share ha (in %) and yield	feed requirements in ha	in kg/day	in kg/year	share ha (in %) and yield	feed requirements in ha	in kg/day	in kg/year	share ha (in %) and yield	feed requirements in ha	in kg/day	in kg/year	share ha (in %) and yield	feed requirements in ha
Region 5 - F MPA	Grass land	54763	36370.6	18392.4	6.9423	2533.94	0.422323	9012.38	7.0655	2578.91	0.429818	17432.1	1.8	657	0.1095	2474.04	0.7	255.5	0.0425833	79.6308	0	0	0	0	0	0	0	0	10	3650	0.608333	7371.17	0	0	0	0	0	0	0	0	0.00373166	1.36206	0.000227009	1.23924
	Clover grass, lucerne	1287.52	4333.16	-3045.64	3.35313	1223.89	0.202967	4331.31	0	0	0	0	0	0	0	0	0	0	0	0	0	0	0	0	0	0	0	0	0	0	0	0	0	0	0	0	0	0	0	0	0.00559749	2.04308	0.00033882	1.84962
	Cereals	68297.9	13472.4	54825.4	0.538062	196.393	0.0294442	628.338	0.626101	228.527	0.0342619	1389.56	2.1	766.5	0.114918	2596.45	0.3	109.5	0.0164168	30.6994	1.82	664.3	0.0995952	6217.63	4.6	1679	0.251724	978.2	1.5	547.5	0.082084	994.611	0.0322747	11.7803	0.00176616	614.141	0.0323	11.7895	0.00176754	4.94735	0.0597065	21.7929	0.0032673	17.8362
	Maize silage	8330.14	3089.73	5240.41	9.32992	3405.42	0.062154	1326.37	5.47838	1999.61	0.0364959	1480.16	0	0	0	0	0	0	0	0	0.455	166.075	0.00303112	189.23	0	0	0	0	0	0	0	0	0.0391209	14.2791	0.000260615	90.623	0.034	12.41	0.000226501	0.633977	0.0746332	27.2411	0.000497191	2.71417
	Legumes	2438.6	7006.03	-4567.43	1.4349	523.737	0.148789	3175.16	0	0	0	0	0	0	0	0	0	0	0	0	0.455	166.075	0.0471804	2945.43	0.82	299.3	0.0850284	330.42	0	0	0	0	0.0146703	5.35467	0.00152121	528.967	0.017	6.205	0.00176278	4.93403	0.0373166	13.6206	0.00386948	21.1235
	Vegetables/Carottes	4569	15.4273	4553.57	0	0	0	0	0	0	0	0	0	0	0	0	0	0	0	0	0	0	0	0	0	0	0	0	0.1	36.5	0.00127319	15.4273	0	0	0	0	0	0	0	0	0	0	0	0
	Sunflower/Rape seed	7210.21	4560.48	2649.73	0.237921	86.8413	0.0332725	710.036	0.469576	171.395	0.0656686	2663.32	0	0	0	0	0	0	0	0	0.07	25.55	0.00978927	611.134	0	0	0	0	0	0	0	0	0.0117363	4.28374	0.00164128	570.717	0.00255	0.93075	0.000356609	0.998149	0.00559749	2.04308	0.000782791	4.27325
					Dairy cow + offspring				Cattle				Sheep				Goat				Fattening pig				Breeding sow				Equine				Laying hens + pullets				Broiler chicken				Other Poultry (Geese, Turkey, Ducks)
Number of animals:								9972				12838				13349				564				22413				672				1862				52729				87225				310
	Fodder	Available agricultural area	Necessary feed (sum)	Left/missing (e.g. for human consumption)	in kg/day	in kg/year	share ha (in %) and yield	feed requirements in ha	in kg/day	in kg/year	share ha (in %) and yield	feed requirements in ha	in kg/day	in kg/year	share ha (in %) and yield	feed requirements in ha	in kg/day	in kg/year	share ha (in %) and yield	feed requirements in ha	in kg/day	in kg/ year	share ha (in %) and yield	feed requirements in ha	in kg/day	in kg/year	share ha (in %) and yield	feed requirements in ha	in kg/day	in kg/year	share ha (in %) and yield	feed requirements in ha	in kg/day	in kg/year	share ha (in %) and yield	feed requirements in ha	in kg/day	in kg/year	share ha (in %) and yield	feed requirements in ha	in kg/day	in kg/year	share ha (in %) and yield	feed requirements in ha
Region 6 - M-B	Grass land	19311	12347.9	6963.07	6.9423	2533.94	0.422323	4211.41	7.0655	2578.91	0.429818	5518	1.8	657	0.1095	1461.72	0.7	255.5	0.0425833	24.017	0	0	0	0	0	0	0	0	10	3650	0.608333	1132.72	0	0	0	0	0	0	0	0	0.00387706	1.41513	0.000235855	0.0731149
	Clover grass, lucerne	338.516	2024.1	-1685.58	3.35313	1223.89	0.202967	2023.99	0	0	0	0	0	0	0	0	0	0	0	0	0	0	0	0	0	0	0	0	0	0	0	0	0	0	0	0	0	0	0	0	0.00581559	2.12269	0.000352022	0.109127
	Cereals	19595.1	5079.34	14515.8	0.538062	196.393	0.0294442	293.617	0.626101	228.527	0.0342619	439.854	2.1	766.5	0.114918	1534.03	0.3	109.5	0.0164168	9.25907	1.82	664.3	0.0995952	2232.23	4.6	1679	0.251724	169.159	1.5	547.5	0.082084	152.84	0.0322747	11.7803	0.00176616	93.1278	0.0323	11.7895	0.00176754	154.174	0.062033	22.642	0.00339461	1.05233
	Maize silage	2265.65	1189.93	1075.72	9.32992	3405.42	0.062154	619.8	5.47838	1999.61	0.0364959	468.534	0	0	0	0	0	0	0	0	0.455	166.075	0.00303112	67.9365	0	0	0	0	0	0	0	0	0.0391209	14.2791	0.000260615	13.742	0.034	12.41	0.000226501	19.7566	0.0775412	28.3025	0.000516564	0.160135
	Legumes	931.676	2833.53	-1901.86	1.4349	523.737	0.148789	1483.72	0	0	0	0	0	0	0	0	0	0	0	0	0.455	166.075	0.0471804	1057.45	0.82	299.3	0.0850284	57.1391	0	0	0	0	0.0146703	5.35467	0.00152121	80.212	0.017	6.205	0.00176278	153.759	0.0387706	14.1513	0.00402025	1.24628
	Vegetables/Carottes	35	2.37069	32.6293	0	0	0	0	0	0	0	0	0	0	0	0	0	0	0	0	0	0	0	0	0	0	0	0	0.1	36.5	0.00127319	2.37069	0	0	0	0	0	0	0	0	0	0	0	0
	Sunflower/Rape seed	2040.71	1512.15	528.559	0.237921	86.8413	0.0332725	331.794	0.469576	171.395	0.0656686	843.054	0	0	0	0	0	0	0	0	0.07	25.55	0.00978927	219.407	0	0	0	0	0	0	0	0	0.0117363	4.28374	0.00164128	86.543	0.00255	0.93075	0.000356609	31.1052	0.00581559	2.12269	0.000813292	0.25212

## Sheet: S3_Crops
	Crops land and crops in ha																		Share of animal consumption only
		Cereals																	0.176577					Shares conventional and organic in ha
			thereof																					in ha
	Crop land total	Cereals total	Wheat, spelt, Einkorn	Rye	Triticale	Barley	Oat	Corn maize / Corn-Cob-Mix	Other cereals	Silage maize	Sugar beets	Potatoes	Winter oilseed rape	Pulses	Vegetables	Grassland	Permanent Crops	Clover grass/lucerne	Available ha for animal consumption only	Available ha for direct human consumption		Region	total and organic	Crop land total	Cereals total	Wheat	Rye	Triticale	Barley	Oat	Corn maize / Corn-Cob-Mix	Other cereals	Silage maize	Sugar beets	Potatoes	Winter oilseed rape	Pulses	Vegetables
1 Hesse	464437	289347	143606	15059	19342	87266	9277	13470	1327	43897	16504	4421	43204	13410	7494	294288	5855	5300	82009	328828		Hesse	total	464437	289348	143606	15059	19342	87266	9277	13470	1327	43897	16504	4421	43204	13410	7494
2 GD Da	145714	88511	48442	4670	2440	23057	2458	6963	481	11689	8845	3192	11406	3303	6582	83574	4888	1662.84		109298		Hesse	organic farms (partly and full)		22296	9318	2383	3101	3655	2496	787	556	1425	318	495	179	4666
3 GD Gi	113216	72640	33400	3658	5657	23318	3039	3198	370	10198	1486	487	11465	3737	150	92089	202	1291.98		77559.9		GD Da	total	145714	88512	48442	4670	2440	23057	2458	6963	481	11689	8845	3192	11406	3303	6582
4 GD Ka	204239	128197	61764	6731	11244	40892	3780	3310	476	22010	6173	742	20333	6371	763	118627	726	2330.71		141973		GD Da	organic farms (partly and full)		4506	1925	467	372	712	534	389	108	188	157	187	52	881
5 F MPA	112825	69097	38528	3991	1825	16787	1614	5967	385	9155	7361	1014	7773	2463	4569	54763	1400	1287.52		82145.1		GD Gi	total	113216	72639	33400	3658	5657	23318	3039	3198	370	10198	1486	487	11465	3737	150
6 M-B	29664	19765	8189	1417	1791	5777	889	1619	83	2490	313	77	2200	941	35	19311	21	338.516		19027		GD Gi	organic farms (partly and full)		8677	3523	962	1292	1402	1060	235	202	550	52	103	71	1595
																						GD Ka	total	204239	128197	61764	6731	11244	40892	3780	3310	476	22010	6173	742	20333	6371	763
																						GD Ka	organic farms (partly and full)		9113	3870	954	1437	1541	902	163	247	688	109	205	57	2190
		0	0	0	0	0	0	0	0	0	0	0	0	0								F MPA	total	112825	69043	38528	3991	1825	16787	1614	5967	385	9155	7361	1014	7773	2463	4569
																						F MPA	organic farms (partly and full)		3691	1578	392	282	480	378	330	65	115	69	127	0	762
Region	Crop land total	Cereals total	Wheat	Rye	Triticale	Barley	Oat	Corn maize / Corn-Cob-Mix	Other cereals	Silage maize	Sugar beets	Potatoes	Winter oilseed rape	Legumes	Vegetables			Clover grass/lucerne					total	29664	19765	8189	1417	1791	5777	889	1619	83	2490	313	77	2200	941	35
1 Hesse	1	0.623006	0.496311	0.0520448	0.0668471	0.301596	0.0320618	0.0465531	0.00458619	0.0945166	0.0355355	0.00951905	0.0930245	0.0288737	0.0161357			0.0114117				M-B	organic farms (partly and full)		2625	918	370	449	471	277	103	35	152	•	22	•	538
2 GD Da	1	0.60743	0.547299	0.0527618	0.0275672	0.260499	0.0277706	0.0786682	0.00543435	0.0802188	0.0607011	0.0219059	0.0782766	0.0226677	0.0451707			0.0114117				M-B
3 GD Gi	1	0.641605	0.459802	0.0503579	0.0778772	0.321008	0.0418365	0.0440253	0.00509361	0.0900756	0.0131254	0.00430151	0.101267	0.0330077	0.0013249			0.0114117			in %
4 GD Ka	1	0.627681	0.48179	0.0525051	0.0877088	0.318978	0.0294859	0.0258196	0.00371304	0.107766	0.0302244	0.003633	0.0995549	0.0311938	0.00373582			0.0114117				Hesse	total	1	0.623008	0.496309	0.0520446	0.0668468	0.301595	0.0320617	0.0465529	0.00458617	0.0945166	0.0355355	0.00951905	0.0930245	0.0288737	0.0161357
5 F MPA	1	0.612426	0.557593	0.0577594	0.0264121	0.242948	0.0233585	0.0863569	0.00557188	0.0811434	0.0652426	0.00898737	0.0688943	0.0218303	0.0404963			0.0114117				Hesse	organic farms (partly and full)			0.417922	0.10688	0.139083	0.163931	0.111948	0.0352978	0.0249372
6 M-B	1	0.666296	0.414318	0.0716924	0.0906147	0.292284	0.0449785	0.0819125	0.00419934	0.0839401	0.0105515	0.00259574	0.074164	0.031722	0.00117988			0.0114117				GD Da	total	1	0.607436	0.547293	0.0527612	0.0275669	0.260496	0.0277702	0.0786673	0.00543429	0.0802188	0.0607011	0.0219059	0.0782766	0.0226677	0.0451707
			Shares of crops used for energy purposes and industry (excl. starch production) in %																			GD Da	organic farms (partly and full)			0.427208	0.10364	0.0825566	0.158012	0.118509	0.0863293	0.023968
			0.020742							0.0900995	0.0183723	0.00365652	0.0724028	0.00990821								GD Gi	total	1	0.641597	0.459808	0.0503586	0.0778783	0.321012	0.041837	0.0440259	0.00509368	0.0900756	0.0131254	0.00430151	0.101267	0.0330077	0.0013249
			Shares of crops used for energy purposes and industry (excl. starch production) in ha																			GD Gi	organic farms (partly and full)			0.406016	0.110868	0.148899	0.161577	0.122162	0.0270831	0.0232799
1 Hesse		6001.64	2978.68							3955.1	303.216	16.1655	3128.09	132.869								GD Ka	total	1	0.627681	0.48179	0.0525051	0.0877088	0.318978	0.0294859	0.0258196	0.00371304	0.107766	0.0302244	0.003633	0.0995549	0.0311938	0.00373582
2 GD Da		1835.9	1004.79							1053.17	162.503	11.6716	825.827	32.7268								GD Ka	organic farms (partly and full)			0.424668	0.104686	0.157687	0.169099	0.0989795	0.0178865	0.0271041
3 GD Gi		1506.7	692.784							918.835	27.3012	1.78072	830.099	37.027								F MPA	total	1	0.611948	0.558029	0.0578046	0.0264328	0.243138	0.0233767	0.0864244	0.00557624	0.0811434	0.0652426	0.00898737	0.0688943	0.0218303	0.0404963
4 GD Ka		2659.07	1281.11							1983.09	113.412	2.71313	1472.17	63.1252								F MPA	organic farms (partly and full)			0.427526	0.106204	0.0764021	0.130046	0.102411	0.0894067	0.0176104
5 F MPA		1433.21	799.149							824.861	135.238	3.70771	562.787	24.4039								M-B	total	1	0.666296	0.414318	0.0716924	0.0906147	0.292284	0.0449785	0.0819125	0.00419934	0.0839401	0.0105515	0.00259574	0.074164	0.031722	0.00117988
6 M-B		409.966	169.856							224.348	5.75053	0.281552	159.286	9.32363								M-B	organic farms (partly and full)			0.349714	0.140952	0.171048	0.179429	0.105524	0.0392381	0.0133333
Total crop land minus shares for energy purposes and industry (excl. starch production) in ha
	0.122028	0.0102945	0.020742							0.0900995	0.0183723	0.00365652	0.0724028	0.00990821
1 Hesse	407763	286368	140627	15059	19342	87266	9277	13470	1327	39941.9	16200.8	4404.83	40075.9	13277.1	7494
2 GD Da	130437	87506.2	47437.2	4670	2440	23057	2458	6963	481	10635.8	8682.5	3180.33	10580.2	3270.27	6582
3 GD Gi	97655.2	71947.2	32707.2	3658	5657	23318	3039	3198	370	9279.17	1458.7	485.219	10634.9	3699.97	150
4 GD Ka	179673	126916	60482.9	6731	11244	40892	3780	3310	476	20026.9	6059.59	739.287	18860.8	6307.87	763
5 F MPA	99081.9	68297.9	37728.9	3991	1825	16787	1614	5967	385	8330.14	7225.76	1010.29	7210.21	2438.6	4569
6 M-B	25252.2	19595.1	8019.14	1417	1791	5777	889	1619	83	2265.65	307.249	76.7184	2040.71	931.676	35
Human Consumption, incl. Industrial starch and sugar	0.185193
		Total crop land minus shares for energy purposes and industry (excl. starch production) in dt
Yields	dt/ha
Hesse		1.91008e+07	9.27437e+06	847822	1.2756e+06	5628657	447267	1256751	33175	2.18842e+07	1.37269e+07	1.85267e+06	1.42269e+06	350516	2.14838e+06
GD Da		5.83666e+06	3.12848e+06	262921	160918	1.48718e+06	118506	649648	12025	5.82737e+06	7.35668e+06	1.33765e+06	375596	86335.2	1.88693e+06
GD Gi		4.79888e+06	2.15704e+06	205945	373079	1504011	146518	298373	9250	5.08405e+06	1.23596e+06	204083	377539	97679.3	43002.1
GD Ka		8.46529e+06	3.98885e+06	378955	741542	2637534	182243	308823	11900	1.09727e+07	5.13429e+06	310944	669560	166528	218737
F MPA		4.55547e+06	2.48822e+06	224693	120359	1.08276e+06	77815	556721	9625	4.56408e+06	6.12239e+06	424929	255963	64378.9	1.30984e+06
M-B		1.307e+06	528863	79777.1	118116	372616	42860.9	151053	2075	1.24135e+06	260332	32267.8	72445.3	24596.3	10033.8
Yields	kg/ha	Total crop land minus shares for energy purposes and industry (excl. starch production) in kg
Hesse		1.91008e+09	9.27437e+08	84782170	1.2756e+08	562865700	4.47267e+07	125675100	3317500	2.18842e+09	1.37269e+09	1.85267e+08	1.42269e+08	3.50516e+07	2.14838e+08
GD Da		5.83666e+08	3.12848e+08	26292100	1.60918e+07	148717650	1.18506e+07	64964790	1202500	5.82737e+08	7.35668e+08	1.33765e+08	3.75596e+07	8.63352e+06	1.88693e+08
GD Gi		4.79888e+08	2.15704e+08	20594540	3.73079e+07	150401100	1.46518e+07	2.98373e+07	925000	5.08405e+08	1.23596e+08	2.04083e+07	3.77539e+07	9.76793e+06	4.30021e+06
GD Ka		8.46529e+08	3.98885e+08	37895530	74154180	263753400	1.82243e+07	30882300	1190000	1.09727e+09	5.13429e+08	3.10944e+07	6.6956e+07	1.66528e+07	2.18737e+07
F MPA		4.55547e+08	2.48822e+08	22469330	1.20359e+07	108276150	7.7815e+06	55672110	962500	4.56408e+08	6.12239e+08	4.24929e+07	2.55963e+07	6.43789e+06	1.30984e+08
M-B		1.307e+08	5.28863e+07	7.97771e+06	1.18116e+07	37261650	4.28609e+06	1.51053e+07	207500	1.24135e+08	2.60332e+07	3.22678e+06	7.24453e+06	2.45963e+06	1.00338e+06
Organic share for total Hesse
		0.08	0.06	0.16	0.16	0.04	0.27	0.06	0.42	0.03	0.02	0.11	0.0041	0.35

## Sheet: S4_Calc. base energy plants
Cereals	Maize	Grassland	Pulses	Rape Seed	Sugar beet	Potatoes
0.020742	0.0900995	0.00990821	0.00990821	0.0724028	0.0183723	0.00365652
Germany		Bio gas, fuel, industry
11657000	ha crop land total in Germany			of total
2650000	ha crop for energy sourcing or industry	0.227331
	ha crop for energy sourcing and non-food industry	0.214807
about 20% of total	for energy sourcing or industry
thereof for biogas						Left for animal and human purposes
1400000	ha for bio gas	0.528302	of bio gas	0.1201
0.66	Maize	0.66	0.348679	0.0792657
0.33	cereals and grass and sugar root and pulses	0.33	0.17434		0.0396328	each crop 25%
	wheat	0.0825	0.0435849	0.00990821
	Gras	0.0825	0.0435849	0.00990821
	Sugar beet	0.0825	0.0435849	0.00990821
	Legumes	0.0825	0.0435849	0.00990821
for fuel
960000	ha for fuel	0.362264		0.082354
713000	ha rape seed	0.742708	0.269057	0.061165
251000	ha for ethanol	0.261458	0.094717		0.0215321
	mainly wheat, rye, sugar beet and corn maize					cereals, sugar beet, maize - each 33%
	wheat	0.0871519	0.031572	0.0071773
	sugar beet	0.0871519	0.031572	0.0071773
	maize	0.0871519	0.031572	0.0071773
286000	Industry	0.107925		0.0245346		thereof
131000	ha rape seed for technical purposes	0.458042	0.049434	0.0112379		0.049434
128000	ha wheat, potatoes, maize for industrial starch	0.447552	0.0483019	0.0109805		0.0539623	0.0109805
	wheat	0.149035	0.0160845	0.00365652
	potatoes	0.149035	0.0160845	0.00365652
	maize	0.149035	0.0160845	0.00365652
15000	ha sugar beets for industrial sugar	0.0524476	0.00566038	0.00128678
12000	ha for medical and colouring plants	0.041958	0.0045283	0.00102942
	Cereals
Bio gas	0.1
Fodder	0.6
Human consumption	0.185193
Others	0.1

## Sheet: S5_Livestock
																		thereof					thereof
Spalte1	Spalte2	Total livestock	Total livestock2	Cattle	Cattle2	Diary Cows2	Pigs	Pigs2	Breeding Sow	Sheep	Sheep2	Goats	Goats2	Equine	Equine2	Chicken	Chicken2	Pullets	Laying hens	Broiler chicken	Other poultry	Other poultry2	Geese	Geese	Ducks	Ducks	Turkeys	Turkeys
		Farms	LSU	Farms	Animals	Animals	Farms	Animals	Animals	Farms	Animals	Farms	Animals	Farms	Animals	Farms	Animals	Animals	Animals	Animals	Farms	Animals	Animals	%	Animals	%	Animals	%
1	Hesse	10221	411548	6429	406304	124705	2407	543934	32645	1391	129507	852	10564	3322	34453	2947	2653472	154826	1487556	1011090	541	135093	14371	0.106379	5244	0.0388177	115478	0.854804
2	GD Da	2790	102548	1583	96709	25464	494	81347	4934	413	35519	277	3377	1173	18169	890	780297	590	737566	42141	184	13927	7830	0.562217	3204	0.230057	2893	0.207726
3	GD Gi	2768	106511	1759	112419	32903	497	103216	7459	430	45998	238	2924	934	7216	782	362397	53958	193655	114784	133	24066	2175	0.0903765	451	0.0187401	21440	0.890883
4	GD Ka	4663	202490	3087	197176	66055	1416	359371	20190	548	47990	337	4263	1215	9068	1275	1510778	100278	556335	854165	224	97100	4366	0.044964	1589	0.0163646	91145	0.938671
5	F MPA	1826	68070	1008	61897	16005	362	62429	3886	257	22594	171	1870	741	12117	565	489549	144	347583	2799	113	5459	2366	0.433413	2110	0.386518	813	0.148928
6	Marburg-Biedenkopf	800	25011	500	25652	7479	186	22413	672	114	13349	62	564	271	1862	111	53462		52729	87225	17	310	167	0.53871	100	0.322581	43	0.13871

## Sheet: S6_SSD_plants
		Cereals					Cereals			Silage maize	Sugar from sugar beets 20% sugar per beet	Potatoes	Oil from oilseed rape 2.3 kg per 1 l oil	Legumes (95% in Hesse for livestock)
	in ha		thereof				thereof								Vegetables	Sums
			Wheat, Spelt, Einkorn	Rye	Triticum momoccoccum	Barley	Oat	Corn maize / Corn-Cob-Mix	Other cereals							for humans and animals	only for animals	share of animal feed	share of Other cereals
		Cereals total (wheat, spelt, Einkorn, rye, barley, oat, other cereals)
Production in kg	1 Hesse	1.91008e+09	9.27437e+08	84782170	1.2756e+08	562865700	4.47267e+07	125675100	3317500	2.18842e+09	1.37269e+09	1.85267e+08	1.42269e+08	3.50516e+07	2.14838e+08	1.34741e+10	2.4767e+09	0.183812	0.00173684
	2 GD Da	5.83666e+08	3.12848e+08	26292100	1.60918e+07	148717650	1.18506e+07	64964790	1202500	5.82737e+08	7.35668e+08	1.33765e+08	3.75596e+07	8.63352e+06	1.88693e+08	4.41669e+09	6.72427e+08	0.152247	0.00206025
	3 GD Gi	4.79888e+08	2.15704e+08	20594540	3.73079e+07	150401100	1.46518e+07	2.98373e+07	925000	5.08405e+08	1.23596e+08	2.04083e+07	3.77539e+07	9.76793e+06	4.30021e+06	3.09937e+09	5.85319e+08	0.188851	0.00192753
	4 GD Ka	8.46529e+08	3.98885e+08	37895530	74154180	263753400	1.82243e+07	30882300	1190000	1.09727e+09	5.13429e+08	3.10944e+07	6.6956e+07	1.66528e+07	2.18737e+07	5.95805e+09	1.21896e+09	0.204591	0.00140574
	5 F MPA	4.55547e+08	2.48822e+08	22469330	1.20359e+07	108276150	7.7815e+06	55672110	962500	4.56408e+08	6.12239e+08	4.24929e+07	2.55963e+07	6.43789e+06	1.30984e+08	3.42091e+09	5.30554e+08	0.155092	0.00211285
	6 M-B	1.307e+08	5.28863e+07	7.97771e+06	1.18116e+07	37261650	4.28609e+06	1.51053e+07	207500	1.24135e+08	2.60332e+07	3.22678e+06	7.24453e+06	2.45963e+06	1.00338e+06	8.16597e+08	1.53512e+08	0.187989	0.00158761
Current consumption per region - necessary production in kg	1 Hesse	5.23745e+08									1.02294e+09	3.75183e+08	3.41694e+08	1.57375e+07	6.88675e+08	4.37428e+09
	2 GD Da	3.3501e+08									654316650	2.39983e+08	2.18562e+08	10066410	4.40506e+08	2.79798e+09
	3 GD Gi	87423648									1.70749e+08	62625594	5.70355e+07	2.62691e+06	114953691	7.30156e+08
	4 GD Ka	1.01312e+08									197874300	7.25742e+07	6.60961e+07	3044220	1.33215e+08	8.46147e+08
	5 F MPA	245660896									4.79806e+08	175978238	1.6027e+08	7.38164e+06	323020457	2.05174e+09
	6 M-B	2.06816e+07									4.03938e+07	1.48152e+07	1.34928e+07	621442	2.71943e+07	1.72731e+08
PHD consumption per region - necessary production in kg	1 Hesse	4.58433e+08									3.06281e+08	9.88003e+07	2.35421e+08	1.482e+08	5.92802e+08	3.08087e+09
	2 GD Da	2.93234e+08									1.9591e+08	6.31969e+07	1.50586e+08	9.47954e+07	3.79182e+08	1.97066e+09
	3 GD Gi	7.65218e+07									5.11244e+07	1.64918e+07	3.92966e+07	2.47376e+07	9.89505e+07	5.14259e+08
	4 GD Ka	8.86779e+07									5.9246e+07	1.91116e+07	4.55392e+07	2.86674e+07	1.1467e+08	5.95954e+08
	5 F MPA	2.15027e+08									1.4366e+08	4.63419e+07	1.10424e+08	6.95129e+07	2.78052e+08	1.44507e+09
	6 M-B	1.81026e+07									1.20944e+07	3.90142e+06	9.29629e+06	5.85212e+06	2.34085e+07	1.21657e+08
Left/missing production in kg (current)	1 Hesse	1.09938e+09									3.49752e+08	-1.89916e+08	-1.99424e+08	1.93141e+07	-4.73837e+08	9.0998e+09
	2 GD Da	1.65901e+08									8.13513e+07	-1.06219e+08	-1.81002e+08	-1.43289e+06	-2.51813e+08	1.61872e+09
	3 GD Gi	3.14853e+08									-4.71538e+07	-4.22173e+07	-1.92816e+07	7.14102e+06	-1.10653e+08	2.36922e+09
	4 GD Ka	6.18636e+08									3.15555e+08	-4.14798e+07	859852	1.36086e+07	-1.11341e+08	5.1119e+09
	5 F MPA	1.4265e+08									1.32432e+08	-1.33485e+08	-1.34674e+08	-943744	-1.92036e+08	1.36917e+09
	6 M-B	8.19376e+07									-1.43605e+07	-1.15884e+07	-6.24823e+06	1.83818e+06	-2.61909e+07	6.43866e+08
Left/missing production in kg (PHD)	1 Hesse	1.1647e+09									1.06641e+09	8.6467e+07	-9.31519e+07	-1.13149e+08	-3.77963e+08	1.03932e+10
	2 GD Da	2.07678e+08									5.39758e+08	7.05677e+07	-1.13026e+08	-8.61619e+07	-1.90488e+08	2.44604e+09
	3 GD Gi	3.25755e+08									7.24711e+07	3.91657e+06	-1.54266e+06	-1.49697e+07	-9.46503e+07	2.58511e+09
	4 GD Ka	6.3127e+08									4.54183e+08	1.19828e+07	2.14168e+07	-1.20146e+07	-9.2796e+07	5.3621e+09
	5 F MPA	1.73285e+08									4.68579e+08	-3.84903e+06	-8.48273e+07	-6.3075e+07	-1.47067e+08	1.97584e+09
	6 M-B	8.45166e+07									1.39389e+07	-674638	-2.05176e+06	-3.3925e+06	-2.24051e+07	6.9494e+08
SSD in % (current consumption)	1 Hesse	3.09908									1.34191	0.493805	0.416366	0.111363	0.311959	3.0803
	2 GD Da	1.49521									1.12433	0.557392	0.171849	0.0428828	0.428355	1.57853
	3 GD Gi	4.60146									0.723842	0.325878	0.661937	0.18592	0.0374082	4.24481
	4 GD Ka	7.10627									2.59472	0.42845	1.01301	0.273515	0.164199	7.04139
	5 F MPA	1.58068									1.27601	0.241467	0.159707	0.0436075	0.405498	1.66732
	6 M-B	4.96186									0.644487	0.217802	0.53692	0.197896	0.0368967	4.72756
Self-sufficiency degree (PHD consumption)	1 Hesse	3.5406									4.48181	1.87517	0.604319	0.0118257	0.362412	4.37347
	2 GD Da	1.70823									3.75512	2.11663	0.249424	0.00455377	0.497633	2.24123
	3 GD Gi	5.25702									2.41754	1.23749	0.960743	0.0197431	0.0434581	6.02687
	4 GD Ka	8.11869									8.66605	1.62699	1.47029	0.0290448	0.190754	9.99751
	5 F MPA	1.80588									4.26172	0.916943	0.231801	0.00463072	0.471079	2.36729
	6 M-B	5.66876									2.15251	0.827079	0.779293	0.0210148	0.042864	6.71229
																	Necessary ha/capita/year	in m2 per capita/year
Necessary ha SSD 100% (current consumption)	1 Hesse	78522.6									12072.9	8920.19	96251.7	6732.64	24022.4	226522	0.0359844	359.844
	2 GD Da	50226.4									7722.37	5705.74	61566.7	4306.49	15365.8	144893	0.0359844	359.844
	3 GD Gi	13107									2015.22	1488.96	16066.3	1123.81	4009.82	37811.1	0.0359844	359.844
	4 GD Ka	15189.2									2335.35	1725.49	18618.6	1302.34	4646.81	43817.8	0.0359844	359.844
	5 F MPA	36830.7									5662.77	4183.98	45146.5	3157.92	11267.6	106250	0.0359844	359.844
	6 M-B	3100.69									476.735	352.239	3800.78	265.858	948.594	8944.89	0.0359844	359.844
Necessary ha PHD	1 Hesse	68730.6									3614.79	2349.03	66315.9	63401.3	20678.1	225090	0.0357568	357.568
	2 GD Da	43963.1									2312.17	1502.54	42418.5	40554.2	13226.6	143977	0.0357568	357.568
	3 GD Gi	11472.5									603.381	392.101	11069.5	10582.9	3451.6	37572	0.0357568	357.568
	4 GD Ka	13295									699.233	454.389	12827.9	12264.1	3999.91	43540.6	0.0357568	357.568
	5 F MPA	32237.9									1695.5	1101.81	31105.2	29738.1	9699.01	105578	0.0357568	357.568
	6 M-B	2714.03									142.74	92.7583	2618.67	2503.58	816.536	8888.32	0.0357568	357.568
	S-S D after animal feeding
		Available after feeding	S-SD current consumption	PHD consumption
	1 Hesse	15305.6	0.0675678	0.0679979
	2 GD Da	10200	0.0703964	0.0708445
	3 GD Gi	651.935	0.0172419	0.0173516
	4 GD Ka	4468.17	0.101972	0.102621
	5 F MPA	6948.53	0.0653983	0.0658145
	6 M-B	45.4523	0.00508136	0.00511371

## Sheet: S7_Clover grass_% Hesse
Crops and grassland
7 Harvest forage
7.3 Legumes for whole crop harvesting and field grass/grass cultivation
Country			year	Forage 1
				Cultivation on arable land
				Legumes for whole crop harvesting (e.g. clover, lucerne, mixtures from 80% legumes)				Field grass/grass cultivation on arable land (incl. mixtures with predominantly grass)
				Cultivated area		Yields per ha	Crop volumes	Cultivated area		Yields per ha	Crop volumes
							menge				menge
				1 000 ha		dt	1 000 t	1 000 ha		dt	1 000 t
	Germany		D 2015/20	285.9		70.7	2021.6	291.1		67.6	1968.5
			2020	331.3		70.7	2343	316.1		68.1	2153.5
			2021	337.7	A	77.8	2627.5	322.8	A	79.7	2571.8
		Hesse	D 2015/20	5.3		51.6	27.1	12.6		55.2	69.7
			2020	4.8		52.4	25.3	17.1		46.2	79.2
			2021	5.3	B	60.3	31.9	19.8	A	61.8	122.3
	in % to cultivated area			0.0114117				0.0426323
______
1 Yield and harvest quantity calculated in dry matter (roughage harvest incl. green fodder and pasture use).

## Sheet: S8_SSD_animal products
							without horses and breeding sows
Production rate of animal products							S-S D 100%		PHD
			Current production	Current consumption per region	Self-sufficiency degree		Necessary m2 per consumption group - grass land	Necessary m2 per consumption group - crop land	Necessary m2 per consumption group - grass land	Necessary m2 per consumption group - crop land				Necessary ha for human consumption (crop land and grass land total)	Available ha	Available m2/capita	Necessary ha for current livestock and plant-based consumption	Necessary m2/capita - for current livestock and plant-based consumption	Necessary ha for S-S D 100% animal products	Necessary m2/capita - for SSD 100%	Necessary ha for PHD	Necessary m2/capita - for PHD	in % current	in % SSD 100%	in % PHD
Region 1	Milk in kg per region	Region 1	1.03737e+09	2.55326e+09	0.406292		244.05	275.431	47.2186	49.57			Region 1	Grass land	294288	467.494	208985	331.984	482996	767.268	80646.8	128.112	0.710136	1.64124	0.27404
	Meat red (cattle, pig, sheep, goat) in kg per region	Region 1	1.10569e+08	264390714	0.418203		489.923	438.968	47.5843	18.3515			Region 1	Crop land (excl energy plants)	407763	647.755	468863	744.816	737476	1171.52	303211	481.669	1.14984	1.80859	0.743597
	Meat white in kg per region	Region 1	2.5703e+07	8.24647e+07	0.311685		0	32.3424	0.0146972	22.4745			Region 1	Crop land for livestock	392457	623.441	242340	384.972	510954	811.68	78121.6	124.101	0.617495	1.30194	0.199058
	Eggs total per region	Region 1	4.28119e+08	1498214046	0.285753		0	42.9133	0	11.6791			Region 1	Crop land for plant-based diet	328158	521.298	226522	359.844	226522	359.844	225090	357.568	0.690285	0.690285	0.685919
						Sum	733.973	789.654	94.8176	102.075
Region 2	Milk in kg per region	Region 2	2.11824e+08	1.63317e+09	0.129701		244.05	275.431	47.2186	53.2901			Region 2	Grass land	83574	207.557	56402.2	140.075	306592	761.423	49231.7	122.267	0.674878	3.66851	0.589079
	Meat red (cattle, pig, sheep, goat) in kg per region	Region 2	1.94822e+07	169115688	0.115201		489.923	438.968	47.5843	44.7632			Region 2	Crop land (excl energy plants)	130437	323.942	194073	481.981	466029	1157.39	200387	497.663	1.48786	3.57282	1.53627
	Meat white in kg per region	Region 2	2.64907e+06	5.2748e+07	0.0502213		0	32.3424	0.0146972	22.4745			Region 2	Crop land for livestock	120237	298.61	49179.4	122.137	321135	797.542	56410	140.095	0.409019	2.67085	0.469156
	Eggs total per region	Region 2	2.12271e+08	958322232	0.221503		0	42.9133	0	11.6791			Region 2	Crop land for plant-based diet	109133	271.033	144893	359.844	144893	359.844	143977	357.568	1.32768	1.32768	1.31928
						Sum	733.973	789.654	94.8176	132.207
Region 3	Milk in kg per region	Region 3	2.73706e+08	426190284	0.642216		244.05	275.431	47.2186	53.2901			Region 3	Grass land	92089	876.4	57551	547.706	81513.1	775.75	14352.8	136.594	0.62495	0.885155	0.155858
	Meat red (cattle, pig, sheep, goat) in kg per region	Region 3	2.38207e+07	44132130	0.539759		489.923	438.968	47.5843	44.7632			Region 3	Crop land (excl energy plants)	97655.2	929.372	95100.7	905.061	123899	1179.13	54577.2	519.404	0.973842	1.26874	0.558877
	Meat white in kg per region	Region 3	3.06717e+06	1.3765e+07	0.222823		0	32.3424	0.0146972	22.4745			Region 3	Crop land for livestock	97003.2	923.168	57289.5	545.217	86087.5	819.284	17005.2	161.836	0.590594	0.88747	0.175305
	Eggs total per region	Region 3	55733909	250082070	0.222862		0	42.9133	0	11.6791			Region 3	Crop land for plant-based diet	77373	736.349	37811.1	359.844	37811.1	359.844	37572	357.568	0.488687	0.488687	0.485596
						Sum	733.973	789.654	94.8176	132.207
Region 4	Milk in kg per region	Region 4	5.49484e+08	4.93894e+08	1.11255		244.05	275.431	47.2186	53.2901			Region 4	Grass land	118627	974.199	95079.9	780.823	94891.4	779.275	17062.2	140.12	0.801503	0.799914	0.143831
	Meat red (cattle, pig, sheep, goat) in kg per region	Region 4	6.72784e+07	51142896	1.3155		489.923	438.968	47.5843	44.7632			Region 4	Crop land (excl energy plants)	179673	1475.53	179540	1474.43	147528	1211.54	67194.2	551.818	0.999257	0.82109	0.37398
	Meat white in kg per region	Region 4	1.99868e+07	1.59517e+07	1.25296		0	32.3424	0.0146972	22.4745			Region 4	Crop land for livestock	175205	1438.84	135722	1114.59	103710	851.697	23653.6	194.25	0.774646	0.591935	0.135005
	Eggs total per region	Region 4	160113213	289809744	0.552477		0	42.9133	0	11.6791			Region 4	Crop land for plant-based diet	141654	1163.3	43817.8	359.844	43817.8	359.844	43540.6	357.568	0.30933	0.30933	0.307373
						Sum	733.973	789.654	94.8176	132.207
Region 5	Milk in kg per region	Region 5	1.33139e+08	1197596868	0.111172		244.05	275.431	47.2186	53.2901			Region 5	Grass land	54763	185.47	36370.6	123.179	224088	758.938	35367.5	119.782	0.664145	4.09196	0.645829
	Meat red (cattle, pig, sheep, goat) in kg per region	Region 5	1.40025e+07	124011510	0.112913		489.923	438.968	47.5843	44.7632			Region 5	Crop land (excl energy plants)	99081.9	335.569	138727	469.837	341726	1157.35	146932	497.628	1.40012	3.44892	1.48294
	Meat white in kg per region	Region 5	848625	3.86798e+07	0.0219398		0	32.3424	0.0146972	22.4745			Region 5	Crop land for livestock	92133.3	312.036	32477.2	109.993	235476	797.507	41354.8	140.06	0.352503	2.55582	0.448858
	Eggs total per region	Region 5	1.00034e+08	702731890	0.142351		0	42.9133	0	11.6791			Region 5	Crop land for plant-based diet	82022	277.791	106250	359.844	106250	359.844	105578	357.568	1.29538	1.29538	1.28719
						Sum	733.973	789.654	94.8176	132.207
Region 6	Milk in kg per region	Region 6	6.22147e+07	1.00823e+08	0.61707		244.05	275.431	47.2186	53.2901			Region 6	Grass land	19311	776.862	12347.9	496.745	19377.6	779.541	3489.66	140.386	0.639425	1.00345	0.180709
	Meat red (cattle, pig, sheep, goat) in kg per region	Region 6	5.29925e+06	10440234	0.507579		489.923	438.968	47.5843	44.7632			Region 6	Crop land (excl energy plants)	25252.2	1015.87	21586.3	868.396	28955.4	1164.85	12556.2	505.123	0.854831	1.14665	0.497232
	Meat white in kg per region	Region 6	1.93101e+06	3.25636e+06	0.592997		0	32.3424	0.0146972	22.4745			Region 6	Crop land for livestock	25206.7	1014.04	12641.4	508.552	20010.5	805.002	3667.87	147.555	0.501511	0.793856	0.145512
	Eggs total per region	Region 6	1.51754e+07	59161326	0.256509		0	42.9133	0	11.6791			Region 6	Crop land for plant-based diet	18980	763.546	8944.89	359.844	8944.89	359.844	8888.32	357.568	0.47128	0.47128	0.468299
						Sum	733.973	789.654	94.8176	132.207
														Note: Differences in m2 because of horses and breeding sows

## Sheet: S9_S-S 100%_Livest feed
																0				0				0				0				0				0				0				0
					Dairy cow + offspring				Cattle				Sheep				Goat				Fattening pig				Breeding sow				Equine				Laying hens				Broiler chicken				Other Poultry (Geese, Turkey, Ducks)
Number of animals:								363774				634480				235328				233149				995640				32645				34453				5.20575e+06				3.48778e+06				420721
	Fodder	Available agricultural area	Necessary feed (sum)	Left/missing (e.g. for human consumption)	in kg/day	in kg/year	share ha (in %) and yield	Feed requirements in ha	in kg/day	in kg/year	share ha (in %) and yield	Feed requirements in ha	in kg/day	in kg/year	share ha (in %) and yield	Feed requirements in ha	in kg/day	in kg/year	share ha (in %) and yield	Feed requirements in ha	in kg/day	in kg/ 6 months	share ha (in %) and yield	Feed requirements in ha	in kg/day	in kg/year	share ha (in %) and yield	Feed requirements in ha	in kg/day	in kg/year	share ha (in %) and yield	Feed requirements in ha	in kg/day	in kg/year	share ha (in %) and yield	Feed requirements in ha	in kg/day	in kg/year	share ha (in %) and yield	Feed requirements in ha	in kg/day	in kg/year	share ha (in %) and yield	Feed requirements in ha
Region 1 - Hesse	Grass land	294288	482996	-188708	6.9423	2533.94	0.422323	153630	7.0655	2578.91	0.429818	272711	1.8	657	0.1095	25768.4	0.7	255.5	0.0425833	9928.25	0	0	0	0	0	0	0	0	10	3650	0.608333	20958.9	0	0	0	0	0	0	0	0		0	0	0
	Clover grass, lucerne	5300	74066.8	-68766.8	3.35313	1223.89	0.202967	73834.1	0	0	0	0	0	0	0	0	0	0	0	0	0	0	0	0	0	0	0	0	0	0	0	0	0	0	0	0	0	0	0	0	0.00913681	3.33494	0.000553057	232.683
	Cereals	286368	191130	95238.6	0.538062	196.393	0.0294442	10711	0.626101	228.527	0.0342619	21738.5	2.1	766.5	0.114918	27043.3	0.3	109.5	0.0164168	3827.55	1.82	664.3	0.0995952	99161	4.6	1679	0.251724	8217.53	1.5	547.5	0.082084	2828.04	0.0322747	11.7803	0.00176616	9194.17	0.0323	11.7895	0.00176754	6164.8	0.0974593	35.5727	0.00533323	2243.8
	Maize silage	39941.9	51271.9	-11330	9.32992	3405.42	0.062154	22610	5.47838	1999.61	0.0364959	23155.9	0	0	0	0	0	0	0	0	0.455	166.075	0.00303112	3017.9	0	0	0	0	0	0	0	0	0.0391209	14.2791	0.000260615	1356.7	0.034	12.41	0.000226501	789.987	0.121824	44.4658	0.000811568	341.444
	Legumes	13277.1	120601	-107323	1.4349	523.737	0.148789	54125.5	0	0	0	0	0	0	0	0	0	0	0	0	0.455	166.075	0.0471804	46974.7	0.82	299.3	0.0850284	2775.75	0	0	0	0	0.0146703	5.35467	0.00152121	7919.05	0.017	6.205	0.00176278	6148.21	0.0609121	22.2329	0.00631617	2657.34
	Vegetables/Carottes	7494	43.8654	7450.13	0	0	0	0	0	0	0	0	0	0	0	0	0	0	0	0	0	0	0	0	0	0	0	0	0.1	36.5	0.00127319	43.8654	0	0	0	0	0	0	0	0	0	0	0	0
	Sunflower/Rape seed	40075.9	73841.1	-33765.2	0.237921	86.8413	0.0332725	12103.7	0.469576	171.395	0.0656686	41665.4	0	0	0	0	0	0	0	0	0.07	25.55	0.00978927	9746.6	0	0	0	0	0	0	0	0	0.0117363	4.28374	0.00164128	8544.08	0.00255	0.93075	0.000356609	1243.77	0.00913681	3.33494	0.00127775	537.578
								0				0				0				0				0				0				0				0				0				0
					Dairy cow + offspring				Cattle				Sheep				Goat				Fattening pig				Breeding sow				Equine				Laying hens				Broiler chicken				Other Poultry (Geese, Turkey, Ducks)
Number of animals:								232685				405840				150526				149132				636855				4934				18169				3.32982e+06				2.23094e+06				269111
	Fodder	Available agricultural area	Necessary feed (sum)	Left/missing (e.g. for human consumption)	in kg/day	in kg/year	share ha (in %) and yield	Feed requirements in ha	in kg/day	in kg/year	share ha (in %) and yield	Feed requirements in ha	in kg/day	in kg/year	share ha (in %) and yield	Feed requirements in ha	in kg/day	in kg/year	share ha (in %) and yield	Feed requirements in ha	in kg/day	in kg/ 6 months	share ha (in %) and yield	Feed requirements in ha	in kg/day	in kg/year	share ha (in %) and yield	Feed requirements in ha	in kg/day	in kg/year	share ha (in %) and yield	Feed requirements in ha	in kg/day	in kg/year	share ha (in %) and yield	Feed requirements in ha	in kg/day	in kg/year	share ha (in %) and yield	Feed requirements in ha	in kg/day	in kg/year	share ha (in %) and yield	Feed requirements in ha
Region 2 - GD Da	Grass land	83574	306592	-223018	6.9423	2533.94	0.422323	98268.5	7.0655	2578.91	0.429818	174437	1.8	657	0.1095	16482.6	0.7	255.5	0.0425833	6350.54	0	0	0	0	0	0	0	0	10	3650	0.608333	11052.8	0	0	0	0	0	0	0	0	0	0	0	0
	Clover grass, lucerne	1662.84	47376.3	-45713.5	3.35313	1223.89	0.202967	47227.5	0	0	0	0	0	0	0	0	0	0	0	0	0	0	0	0	0	0	0	0	0	0	0	0	0	0	0	0	0	0	0	0	0.00913681	3.33494	0.000553057	148.834
	Cereals	87506.2	117923	-30416.7	0.538062	196.393	0.0294442	6851.23	0.626101	228.527	0.0342619	13904.9	2.1	766.5	0.114918	17298	0.3	109.5	0.0164168	2448.27	1.82	664.3	0.0995952	63427.7	4.6	1679	0.251724	1242.01	1.5	547.5	0.082084	1491.38	0.0322747	11.7803	0.00176616	5880.99	0.0323	11.7895	0.00176754	3943.27	0.0974593	35.5727	0.00533323	1435.23
	Maize silage	10635.8	32795.7	-22159.9	9.32992	3405.42	0.062154	14462.3	5.47838	1999.61	0.0364959	14811.5	0	0	0	0	0	0	0	0	0.455	166.075	0.00303112	1930.38	0	0	0	0	0	0	0	0	0.0391209	14.2791	0.000260615	867.803	0.034	12.41	0.000226501	505.309	0.121824	44.4658	0.000811568	218.402
	Legumes	3270.27	75785.4	-72515.1	1.4349	523.737	0.148789	34621	0	0	0	0	0	0	0	0	0	0	0	0	0.455	166.075	0.0471804	30047	0.82	299.3	0.0850284	419.53	0	0	0	0	0.0146703	5.35467	0.00152121	5065.37	0.017	6.205	0.00176278	3932.66	0.0609121	22.2329	0.00631617	1699.75
	Vegetables/Carottes	6582	23.1327	6558.87	0	0	0	0	0	0	0	0	0	0	0	0	0	0	0	0	0	0	0	0	0	0	0	0	0.1	36.5	0.00127319	23.1327	0	0	0	0	0	0	0	0	0	0	0	0
	Sunflower/Rape seed	10580.2	47231.9	-36651.8	0.237921	86.8413	0.0332725	7742.03	0.469576	171.395	0.0656686	26651	0	0	0	0	0	0	0	0	0.07	25.55	0.00978927	6234.34	0	0	0	0	0	0	0	0	0.0117363	4.28374	0.00164128	5465.16	0.00255	0.93075	0.000356609	795.572	0.00913681	3.33494	0.00127775	343.858
					Dairy cow + offspring				Cattle				Sheep				Goat				Fattening pig				Breeding sow				Equine				Laying hens				Broiler chicken				Other Poultry (Geese, Turkey, Ducks)
Number of animals:								60721.2				105907				39280.9				38917.2				166192				7459				7216				868944				582181				70226.8
	Fodder	Available agricultural area	Necessary feed (sum)	Left/missing (e.g. for human consumption)	in kg/day	in kg/year	share ha (in %) and yield	Feed requirements in ha	in kg/day	in kg/year	share ha (in %) and yield	Feed requirements in ha	in kg/day	in kg/year	share ha (in %) and yield	Feed requirements in ha	in kg/day	in kg/year	share ha (in %) and yield	Feed requirements in ha	in kg/day	in kg/ 6 months	share ha (in %) and yield	Feed requirements in ha	in kg/day	in kg/year	share ha (in %) and yield	Feed requirements in ha	in kg/day	in kg/year	share ha (in %) and yield	Feed requirements in ha	in kg/day	in kg/year	share ha (in %) and yield	Feed requirements in ha	in kg/day	in kg/year	share ha (in %) and yield	Feed requirements in ha	in kg/day	in kg/year	share ha (in %) and yield	Feed requirements in ha
Region 3 - GD Gi	Grass land	92089	81513.1	10575.9	6.9423	2533.94	0.422323	25644	7.0655	2578.91	0.429818	45520.9	1.8	657	0.1095	4301.26	0.7	255.5	0.0425833	1657.23	0	0	0	0	0	0	0	0	10	3650	0.608333	4389.73	0	0	0	0	0	0	0	0	0	0	0	0
	Clover grass, lucerne	1291.98	12363.2	-11071.3	3.35313	1223.89	0.202967	12324.4	0	0	0	0	0	0	0	0	0	0	0	0	0	0	0	0	0	0	0	0	0	0	0	0	0	0	0	0	0	0	0	0	0.00913681	3.33494	0.000553057	38.8394
	Cereals	71947.2	32529.6	39417.6	0.538062	196.393	0.0294442	1787.88	0.626101	228.527	0.0342619	3628.59	2.1	766.5	0.114918	4514.07	0.3	109.5	0.0164168	638.896	1.82	664.3	0.0995952	16552	4.6	1679	0.251724	1877.61	1.5	547.5	0.082084	592.318	0.0322747	11.7803	0.00176616	1534.69	0.0323	11.7895	0.00176754	1029.03	0.0974593	35.5727	0.00533323	374.536
	Maize silage	9279.17	8558.32	720.847	9.32992	3405.42	0.062154	3774.07	5.47838	1999.61	0.0364959	3865.18	0	0	0	0	0	0	0	0	0.455	166.075	0.00303112	503.749	0	0	0	0	0	0	0	0	0.0391209	14.2791	0.000260615	226.46	0.034	12.41	0.000226501	131.865	0.121824	44.4658	0.000811568	56.9938
	Legumes	3699.97	20301.6	-16601.6	1.4349	523.737	0.148789	9034.64	0	0	0	0	0	0	0	0	0	0	0	0	0.455	166.075	0.0471804	7841.02	0.82	299.3	0.0850284	634.227	0	0	0	0	0.0146703	5.35467	0.00152121	1321.85	0.017	6.205	0.00176278	1026.26	0.0609121	22.2329	0.00631617	443.564
	Vegetables/Carottes	150	9.18737	140.813	0	0	0	0	0	0	0	0	0	0	0	0	0	0	0	0	0	0	0	0	0	0	0	0	0.1	36.5	0.00127319	9.18737	0	0	0	0	0	0	0	0	0	0	0	0
	Sunflower/Rape seed	10634.9	12325.6	-1690.66	0.237921	86.8413	0.0332725	2020.35	0.469576	171.395	0.0656686	6954.79	0	0	0	0	0	0	0	0	0.07	25.55	0.00978927	1626.9	0	0	0	0	0	0	0	0	0.0117363	4.28374	0.00164128	1426.18	0.00255	0.93075	0.000356609	207.611	0.00913681	3.33494	0.00127775	89.7325
								0
					Dairy cow + offspring				Cattle				Sheep				Goat				Fattening pig				Breeding sow				Equine				Laying hens				Broiler chicken				Other Poultry (Geese, Turkey, Ducks)
Number of animals:								70367.3				122732				45521				45099.6				192594				20190				9068				1.00698e+06				674665				81382.9
	Fodder	Available agricultural area	Necessary feed (sum)	Left/missing (e.g. for human consumption)	in kg/day	in kg/year	share ha (in %) and yield	Feed requirements in ha	in kg/day	in kg/year	share ha (in %) and yield	Feed requirements in ha	in kg/day	in kg/year	share ha (in %) and yield	Feed requirements in ha	in kg/day	in kg/year	share ha (in %) and yield	Feed requirements in ha	in kg/day	in kg/ 6 months	share ha (in %) and yield	Feed requirements in ha	in kg/day	in kg/year	share ha (in %) and yield	Feed requirements in ha	in kg/day	in kg/year	share ha (in %) and yield	Feed requirements in ha	in kg/day	in kg/year	share ha (in %) and yield	Feed requirements in ha	in kg/day	in kg/year	share ha (in %) and yield	Feed requirements in ha	in kg/day	in kg/year	share ha (in %) and yield	Feed requirements in ha
Region 4 - GD Ka	Grass land	118627	94891.4	23735.6	6.9423	2533.94	0.422323	29717.7	7.0655	2578.91	0.429818	52752.3	1.8	657	0.1095	4984.55	0.7	255.5	0.0425833	1920.49	0	0	0	0	0	0	0	0	10	3650	0.608333	5516.37	0	0	0	0	0	0	0	0	0	0	0	0
	Clover grass, lucerne	2330.71	14327.2	-11996.5	3.35313	1223.89	0.202967	14282.2	0	0	0	0	0	0	0	0	0	0	0	0	0	0	0	0	0	0	0	0	0	0	0	0	0	0	0	0	0	0	0	0	0.00913681	3.33494	0.000553057	45.0094
	Cereals	126916	40661.5	86254.3	0.538062	196.393	0.0294442	2071.91	0.626101	228.527	0.0342619	4205.02	2.1	766.5	0.114918	5231.17	0.3	109.5	0.0164168	740.39	1.82	664.3	0.0995952	19181.4	4.6	1679	0.251724	5082.31	1.5	547.5	0.082084	744.337	0.0322747	11.7803	0.00176616	1778.49	0.0323	11.7895	0.00176754	1192.5	0.0974593	35.5727	0.00533323	434.034
	Maize silage	20026.9	9917.88	10109	9.32992	3405.42	0.062154	4373.61	5.47838	1999.61	0.0364959	4479.2	0	0	0	0	0	0	0	0	0.455	166.075	0.00303112	583.774	0	0	0	0	0	0	0	0	0.0391209	14.2791	0.000260615	262.435	0.034	12.41	0.000226501	152.812	0.121824	44.4658	0.000811568	66.0478
	Legumes	6307.87	24508.4	-18200.5	1.4349	523.737	0.148789	10469.9	0	0	0	0	0	0	0	0	0	0	0	0	0.455	166.075	0.0471804	9086.64	0.82	299.3	0.0850284	1716.72	0	0	0	0	0.0146703	5.35467	0.00152121	1531.84	0.017	6.205	0.00176278	1189.29	0.0609121	22.2329	0.00631617	514.028
	Vegetables/Carottes	763	11.5453	751.455	0	0	0	0	0	0	0	0	0	0	0	0	0	0	0	0	0	0	0	0	0	0	0	0	0.1	36.5	0.00127319	11.5453	0	0	0	0	0	0	0	0	0	0	0	0
	Sunflower/Rape seed	18860.8	14283.6	4577.25	0.237921	86.8413	0.0332725	2341.3	0.469576	171.395	0.0656686	8059.62	0	0	0	0	0	0	0	0	0.07	25.55	0.00978927	1885.35	0	0	0	0	0	0	0	0	0.0117363	4.28374	0.00164128	1652.74	0.00255	0.93075	0.000356609	240.592	0.00913681	3.33494	0.00127775	103.987
								0
					Dairy cow + offspring				Cattle				Sheep				Goat				Fattening pig				Breeding sow				Equine				Laying hens				Broiler chicken				Other Poultry (Geese, Turkey, Ducks)
Number of animals:								170627				297600				110380				109358				467002				3886				12117				2.44174e+06				1.63593e+06				197338
	Fodder	Available agricultural area	Necessary feed (sum)	Left/missing (e.g. for human consumption)	in kg/day	in kg/year	share ha (in %) and yield	Feed requirements in ha	in kg/day	in kg/year	share ha (in %) and yield	Feed requirements in ha	in kg/day	in kg/year	share ha (in %) and yield	Feed requirements in ha	in kg/day	in kg/year	share ha (in %) and yield	Feed requirements in ha	in kg/day	in kg/ 6 months	share ha (in %) and yield	Feed requirements in ha	in kg/day	in kg/year	share ha (in %) and yield	Feed requirements in ha	in kg/day	in kg/year	share ha (in %) and yield	Feed requirements in ha	in kg/day	in kg/year	share ha (in %) and yield	Feed requirements in ha	in kg/day	in kg/year	share ha (in %) and yield	Feed requirements in ha	in kg/day	in kg/year	share ha (in %) and yield	Feed requirements in ha
Region 5 - F MPA	Grass land	54763	224088	-169325	6.9423	2533.94	0.422323	72059.7	7.0655	2578.91	0.429818	127914	1.8	657	0.1095	12086.6	0.7	255.5	0.0425833	4656.81	0	0	0	0	0	0	0	0	10	3650	0.608333	7371.17	0	0	0	0	0	0	0	0	0	0	0	0
	Clover grass, lucerne	1287.52	34740.7	-33453.2	3.35313	1223.89	0.202967	34631.6	0	0	0	0	0	0	0	0	0	0	0	0	0	0	0	0	0	0	0	0	0	0	0	0	0	0	0	0	0	0	0	0	0.00913681	3.33494	0.000553057	109.139
	Cereals	68297.9	86440.6	-18142.8	0.538062	196.393	0.0294442	5023.96	0.626101	228.527	0.0342619	10196.3	2.1	766.5	0.114918	12684.6	0.3	109.5	0.0164168	1795.3	1.82	664.3	0.0995952	46511.1	4.6	1679	0.251724	978.2	1.5	547.5	0.082084	994.611	0.0322747	11.7803	0.00176616	4312.49	0.0323	11.7895	0.00176754	2891.58	0.0974593	35.5727	0.00533323	1052.45
	Maize silage	8330.14	24048.9	-15718.8	9.32992	3405.42	0.062154	10605.1	5.47838	1999.61	0.0364959	10861.2	0	0	0	0	0	0	0	0	0.455	166.075	0.00303112	1415.54	0	0	0	0	0	0	0	0	0.0391209	14.2791	0.000260615	636.354	0.034	12.41	0.000226501	370.54	0.121824	44.4658	0.000811568	160.153
	Legumes	2438.6	55595.7	-53157.1	1.4349	523.737	0.148789	25387.4	0	0	0	0	0	0	0	0	0	0	0	0	0.455	166.075	0.0471804	22033.3	0.82	299.3	0.0850284	330.42	0	0	0	0	0.0146703	5.35467	0.00152121	3714.4	0.017	6.205	0.00176278	2883.79	0.0609121	22.2329	0.00631617	1246.42
	Vegetables/Carottes	4569	15.4273	4553.57	0	0	0	0	0	0	0	0	0	0	0	0	0	0	0	0	0	0	0	0	0	0	0	0	0.1	36.5	0.00127319	15.4273	0	0	0	0	0	0	0	0	0	0	0	0
	Sunflower/Rape seed	7210.21	34634.9	-27424.7	0.237921	86.8413	0.0332725	5677.19	0.469576	171.395	0.0656686	19543	0	0	0	0	0	0	0	0	0.07	25.55	0.00978927	4571.61	0	0	0	0	0	0	0	0	0.0117363	4.28374	0.00164128	4007.57	0.00255	0.93075	0.000356609	583.388	0.00913681	3.33494	0.00127775	252.149
								0
					Dairy cow + offspring				Cattle				Sheep				Goat				Fattening pig				Breeding sow				Equine				Laying hens				Broiler chicken				Other Poultry (Geese, Turkey, Ducks)
Number of animals:								14364.7				25054.3				9292.6				9206.56				39315.8				672				1862				205564				137725				16613.4
	Fodder	Available agricultural area	Necessary feed (sum)	Left/missing (e.g. for human consumption)	in kg/day	in kg/year	share ha (in %) and yield	Feed requirements in ha	in kg/day	in kg/year	share ha (in %) and yield	Feed requirements in ha	in kg/day	in kg/year	share ha (in %) and yield	Feed requirements in ha	in kg/day	in kg/year	share ha (in %) and yield	Feed requirements in ha	in kg/day	in kg/ 6 months	share ha (in %) and yield	Feed requirements in ha	in kg/day	in kg/year	share ha (in %) and yield	Feed requirements in ha	in kg/day	in kg/year	share ha (in %) and yield	Feed requirements in ha	in kg/day	in kg/year	share ha (in %) and yield	Feed requirements in ha	in kg/day	in kg/year	share ha (in %) and yield	Feed requirements in ha	in kg/day	in kg/year	share ha (in %) and yield	Feed requirements in ha
Region 6 - M-B	Grass land	19311	19377.6	-66.6028	6.9423	2533.94	0.422323	6066.53	7.0655	2578.91	0.429818	10768.8	1.8	657	0.1095	1017.54	0.7	255.5	0.0425833	392.046	0	0	0	0	0	0	0	0	10	3650	0.608333	1132.72	0	0	0	0	0	0	0	0	0	0	0	0
	Clover grass, lucerne	338.516	2924.74	-2586.23	3.35313	1223.89	0.202967	2915.55	0	0	0	0	0	0	0	0	0	0	0	0	0	0	0	0	0	0	0	0	0	0	0	0	0	0	0	0	0	0	0	0	0.00913681	3.33494	0.000553057	9.18816
	Cereals	19595.1	7433.14	12162	0.538062	196.393	0.0294442	422.956	0.626101	228.527	0.0342619	858.406	2.1	766.5	0.114918	1067.88	0.3	109.5	0.0164168	151.142	1.82	664.3	0.0995952	3915.66	4.6	1679	0.251724	169.159	1.5	547.5	0.082084	152.84	0.0322747	11.7803	0.00176616	363.059	0.0323	11.7895	0.00176754	243.435	0.0974593	35.5727	0.00533323	88.603
	Maize silage	2265.65	2024.62	241.031	9.32992	3405.42	0.062154	892.822	5.47838	1999.61	0.0364959	914.377	0	0	0	0	0	0	0	0	0.455	166.075	0.00303112	119.171	0	0	0	0	0	0	0	0	0.0391209	14.2791	0.000260615	53.5732	0.034	12.41	0.000226501	31.1949	0.121824	44.4658	0.000811568	13.4829
	Legumes	931.676	4709.79	-3778.12	1.4349	523.737	0.148789	2137.3	0	0	0	0	0	0	0	0	0	0	0	0	0.455	166.075	0.0471804	1854.93	0.82	299.3	0.0850284	57.1391	0	0	0	0	0.0146703	5.35467	0.00152121	312.707	0.017	6.205	0.00176278	242.78	0.0609121	22.2329	0.00631617	104.933
	Vegetables/Carottes	35	2.37069	32.6293	0	0	0	0	0	0	0	0	0	0	0	0	0	0	0	0	0	0	0	0	0	0	0	0	0.1	36.5	0.00127319	2.37069	0	0	0	0	0	0	0	0	0	0	0	0
	Sunflower/Rape seed	2040.71	2915.83	-875.116	0.237921	86.8413	0.0332725	477.949	0.469576	171.395	0.0656686	1645.28	0	0	0	0	0	0	0	0	0.07	25.55	0.00978927	384.873	0	0	0	0	0	0	0	0	0.0117363	4.28374	0.00164128	337.388	0.00255	0.93075	0.000356609	49.1141	0.00913681	3.33494	0.00127775	21.2278

[truncated: 6 more sheets: S10_PHD_Livestock feed, S11_PHD_extensiveLivest feed , S12_Overview consump, productio, S13_PHD incl crop rotation, A2_Crop yields, A3_Consumption+population]
